# Supplementary material for: Overexpression of OsPGIP2 confers Sclerotinia sclerotiorum resistance in Brassica napus through increased activation of defense mechanisms
Source: PubMed Central journal article supplement (PMC5972623; doi:10.1093/jxb/ery138), 2018-04-10
Supplement: ery138_suppl_supplemental_figures_and_tables.pdf [file ery138_suppl_supplemental_figures_and_tables.pdf]

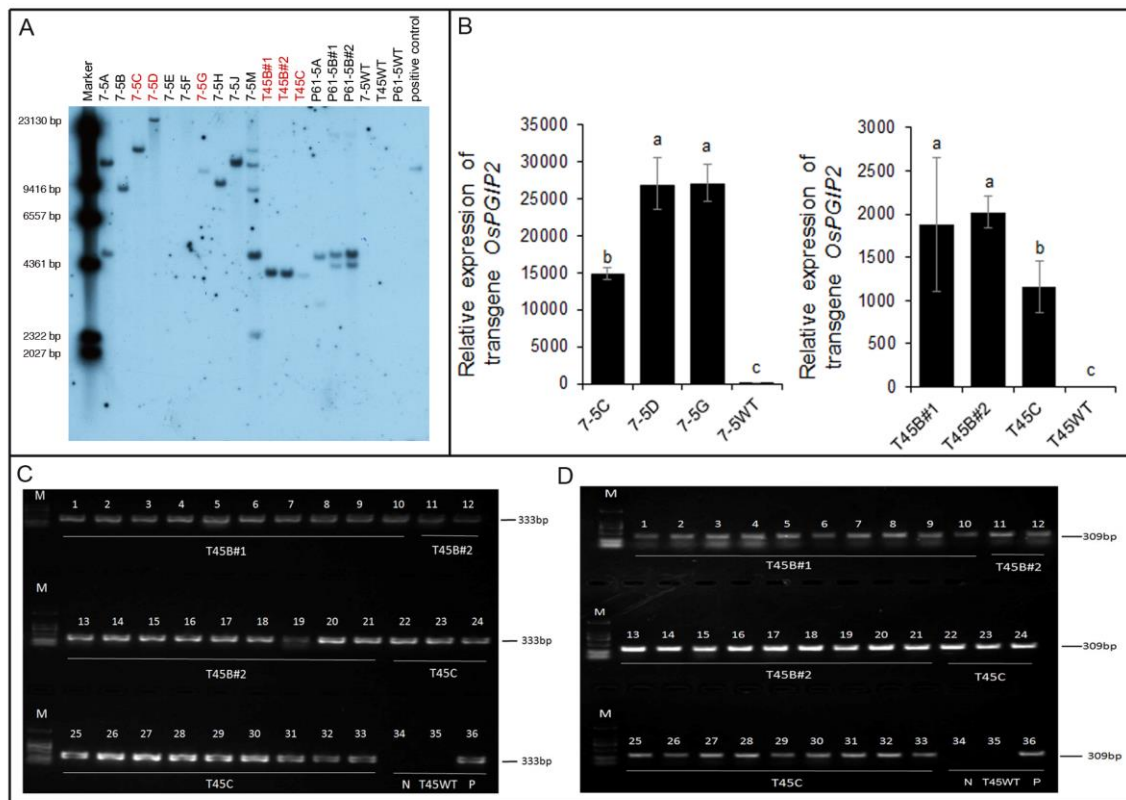

1 **Fig. S1. Analysis of *OsPGIP2* gene expression in transgenic lines by molecular**  
 2 **identification methods.**

3 (A) Southern blot analysis of the copy number of transgenic lines overexpressing  
 4 *OsPGIP2* gene. 50  $\mu$ g of genomic DNA was digested with *KpnI* for southern blot  
 5 detection. 7-5A, 7-5B, 7-5C, 7-5D, 7-5E, 7-5F, 7-5G, 7-5H, 7-5J, 7-5M, T45B#1,  
 6 T45B#2, T45C, P61-5A, P61-5B#1 and P61-5B#2 are transgenic rapeseed lines. 7-  
 7 5WT, T45WT and P61-5WT are non-transgenic rapeseed controls. Positive control is  
 8 pCAMIBA1300-35S:*OsPGIP2* plasmid. Red indicates the transgenic lines selected for  
 9 further study. (B) The expression level of *OsPGIP2* gene in T<sub>2</sub> homozygous transgenic  
 10 plant lines. In transgenic plant lines 7-5C, 7-5D, 7-5G, T45-B#1, T45B#2 and T45C,  
 11 the relative level of *OsPGIP2* expression was normalized to the rapeseed *BnACTIN7*  
 12 gene (*AF111812*). Bars represent mean values from three biological replicates  $\pm$   
 13 standard deviation. Different letters indicate values that are significantly different at P  
 14 < 0.05 as tested by least significant difference (LSD) multiple-comparison test. Non-  
 15 transgenic lines 7-5WT and T45WT served as controls, respectively. (C) and (D)

16 analysis of T<sub>4</sub> transgenic lines by polymerase chain reaction (representative results).  
17 Tested the *OsPGIP2* gene in T45 transgenic lines with 333-L/R primer (C); tested the  
18 *HYG* gene in T45 transgenic lines with 309-*HYG*-L/R primer (D). M refers to DL2000  
19 marker, T45WT is non-transgenic lines control. N means ddH<sub>2</sub>O as negative control. P  
20 is plasmid DNA as positive control.  
21

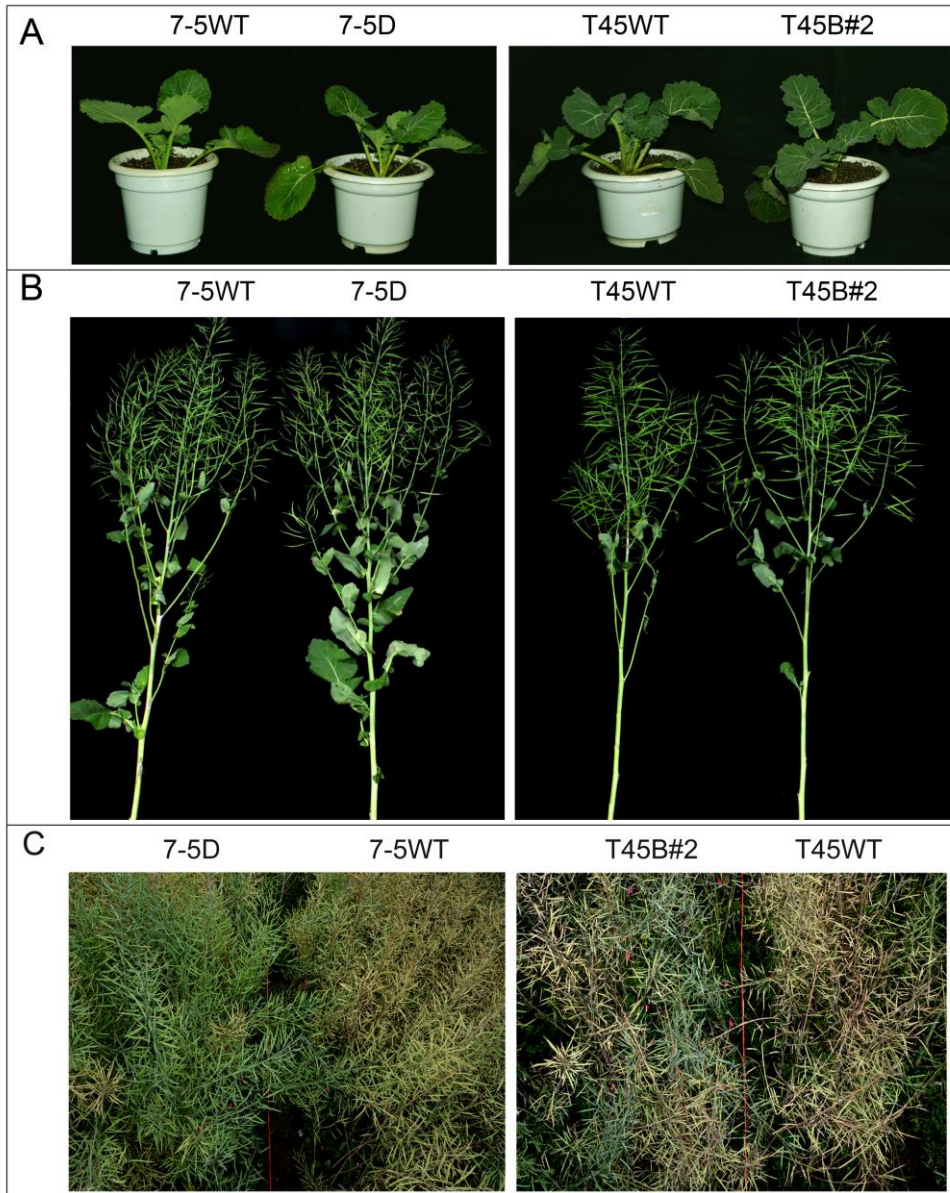

22

23 **Fig. S2. The phenotypes of seedling and adult plant of T<sub>4</sub> transgenic and wild type**  
 24 **lines.**

25 The phenotypes of 13-week-old seedlings (A) and the plants at the stage of silique  
 26 maturity (B) without inoculation with *S. sclerotiorum*. Sprayed mycelium within PDB  
 27 liquid media on adult plants of T<sub>4</sub> transgenic and wild type lines (C). At the flowering  
 28 period, transgenic lines and control *B. napus* plants were sprayed with mycelium  
 29 suspension (50%). Infection phenotypes were assessed at 30 dpi. 7-5WT and T45WT  
 30 are non-transgenic controls.

31

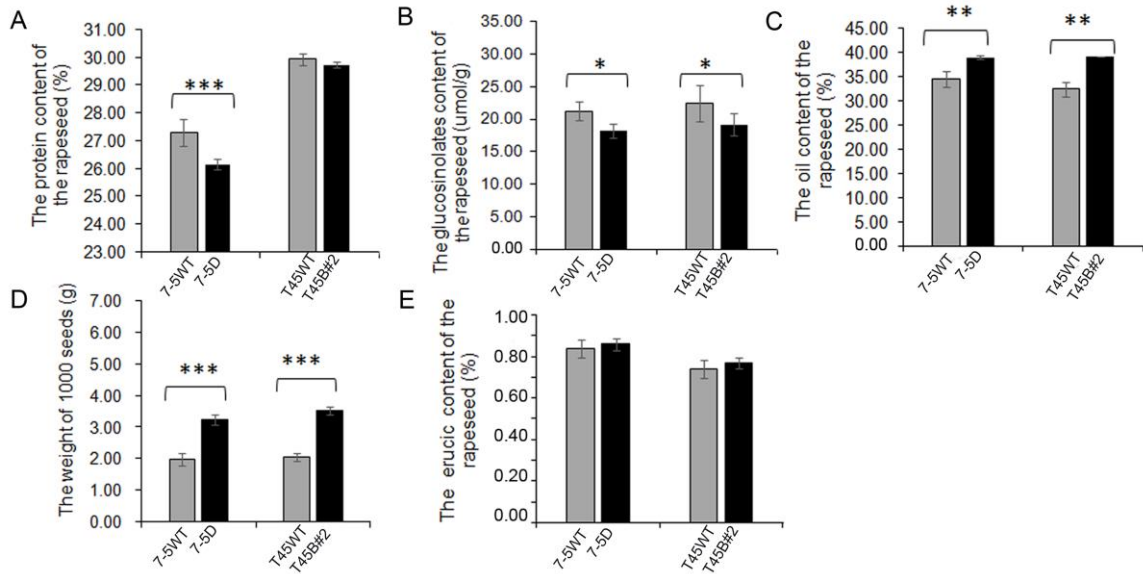

32 **Fig. S3. Seed quality traits of T<sub>4</sub> transgenic lines in the isolated field under the**  
 33 **mycelia inoculation with *S. sclerotiorum*.**

34 The protein content (A), glucosinolate content (B), oil content (C), 1000-seed weight  
 35 (D) and erucic content (E) were measured based on dry condition. Values are means of  
 36 six replicates from two randomized complete blocks ± standard deviation. One-way  
 37 ANOVA was used to test statistical significance. Bars with one asterisk was significant  
 38 difference at P < 0.05, two asterisks were significant difference at P < 0.01 and three  
 39 asterisks were significant difference at P < 0.001.

40

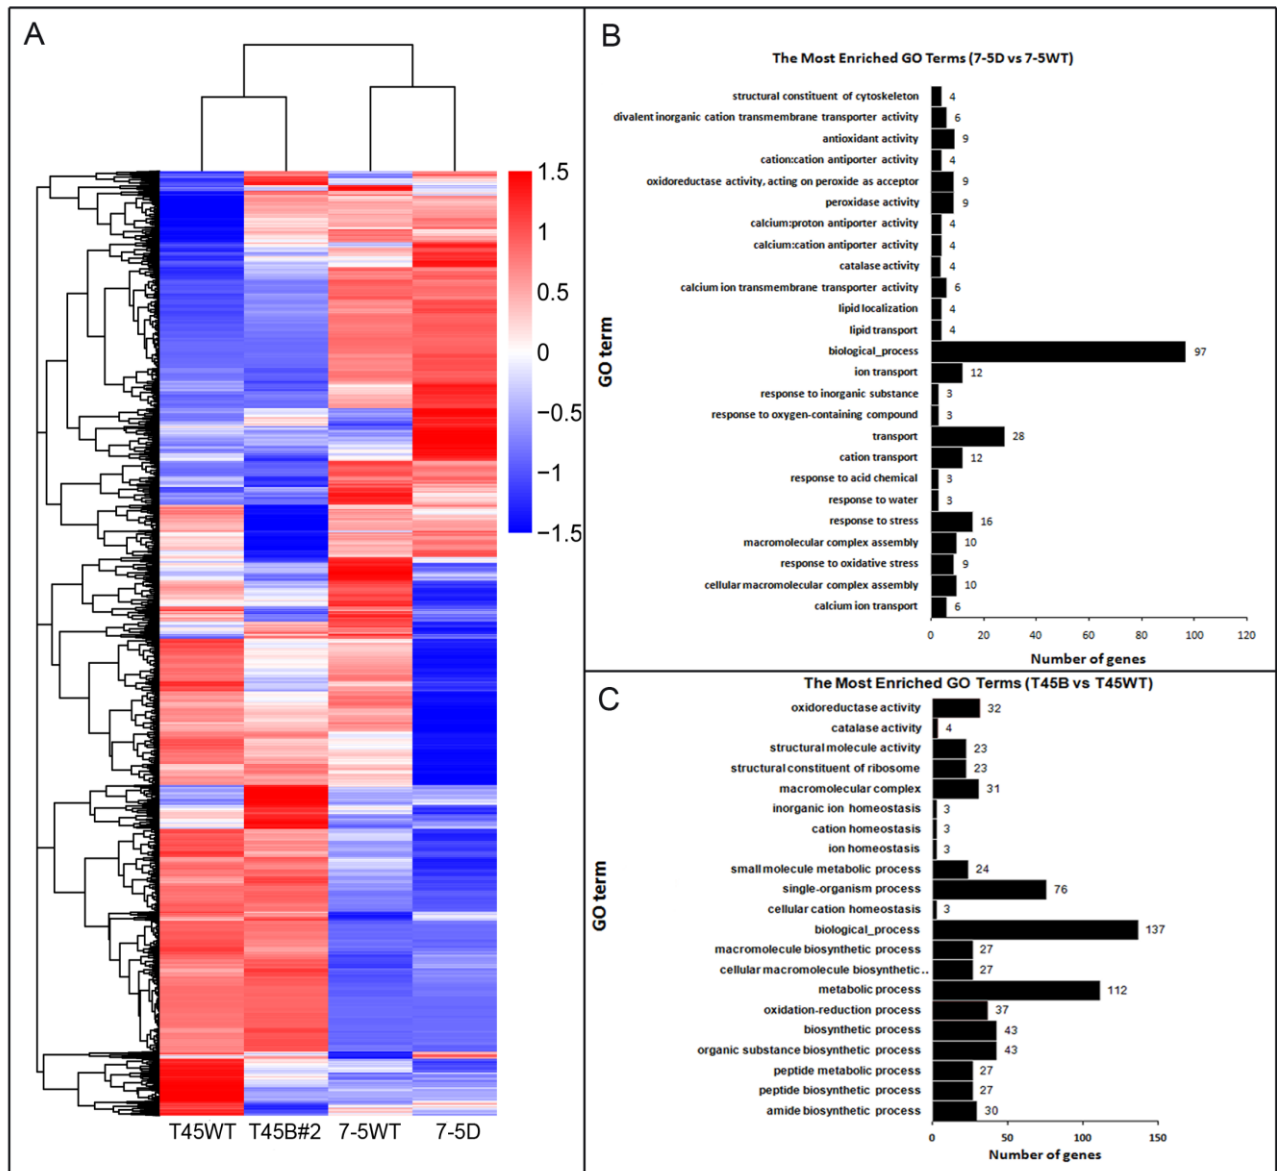

41 **Fig. S4. Clustered heatmap and GO enrichment analysis of differentially**  
 42 **expressed genes (DEGs) of *B. napus* genes responsive to *S. sclerotiorum* between**  
 43 **transgenic and wild type lines.**

44 (A) All differential genes expression (T45B#2 vs T45WT (605), 7-5D vs 7-5WT (886))  
 45 were clustered in the heatmap of based on FPKM (fragments per kilobase of exon per  
 46 million fragments mapped) levels in transgenic *B. napus* and wild type lines in response  
 47 to *S. sclerotiorum* infection. The DEGs are clustered on the Y axis according to  
 48 hierarchical agglomerative clustering. The FPKM was normalized using the  $\log_{10}$   
 49  $(fpkm+1)$  to generate the heatmap. Red and blue represent high and low gene expression,  
 50 respectively. The gene details are shown in the File S1. Upregulated differentially

51 expressed genes (up-DEGs) were analyzed by gene ontology (GO) enrichment in  
52 T45B#2 vs. T45WT (B) and 7-5D vs. 7-5WT responsive to *S. sclerotiorum* (C). The  
53 software method used in the GO enrichment analysis was Goseq (Young et al, 2010)  
54 based on the Wallenius non-central hyper-geometric distribution. Gene Ontology lists  
55 of Arabidopsis(<ftp://ftp.ncbi.nlm.nih.gov/blast/db/FASTA/>) were used.  
56

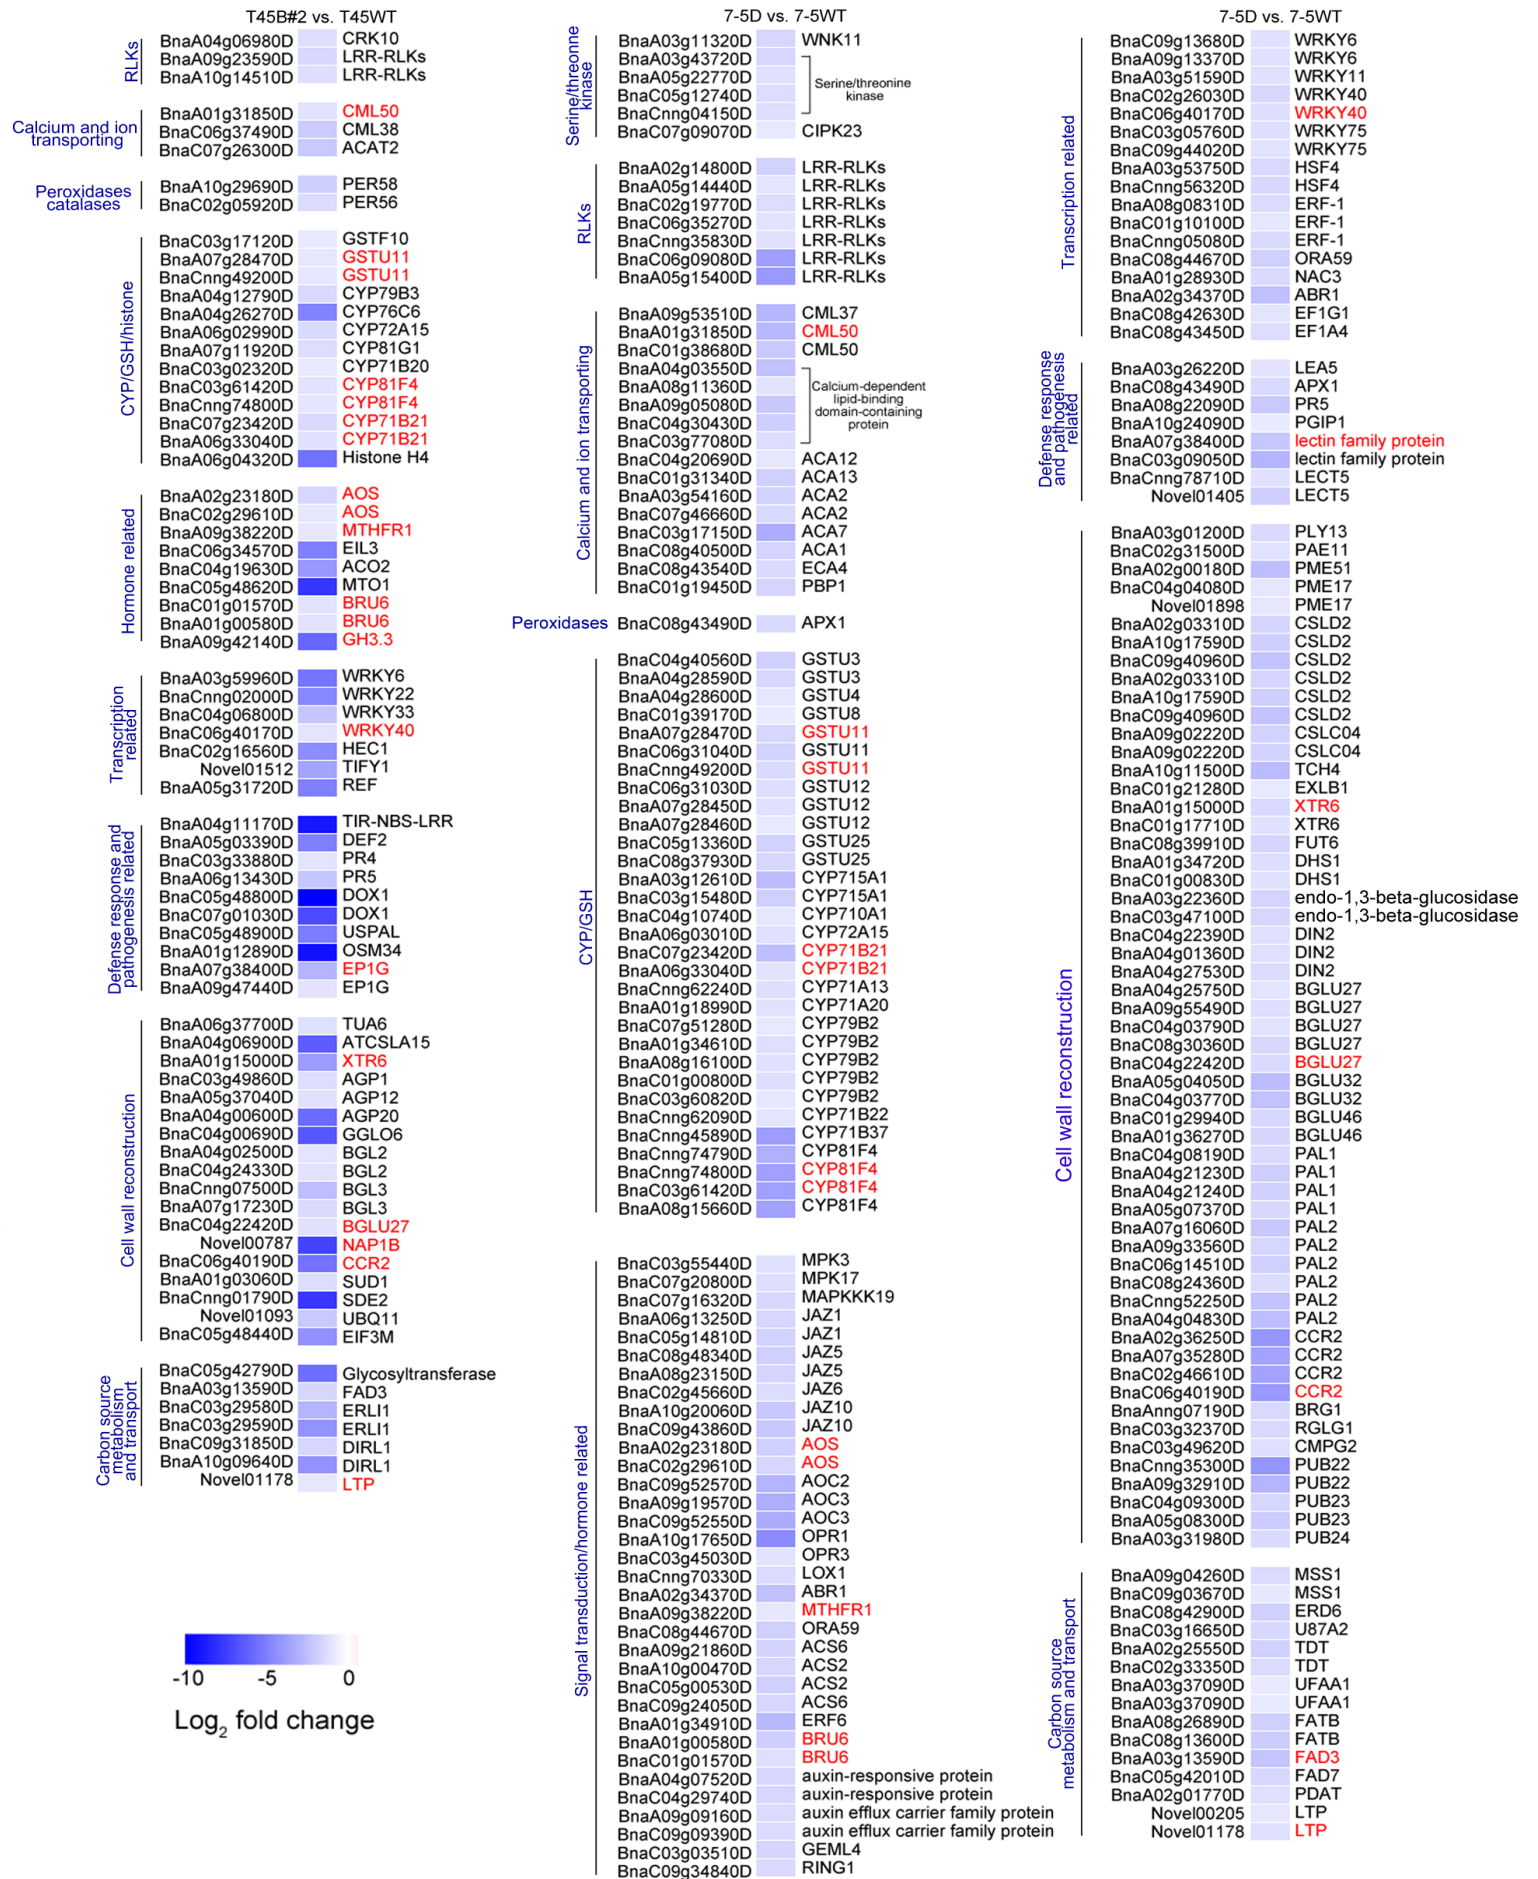

58 **Fig. S5. Clustered heatmap analysis of down differentially expressed genes (down-**  
59 **DEGs) of *B. napus* genes responsive to *S. sclerotiorum* between transgenic and wild**  
60 **type lines.**

61 Down-DEGs were considered statistically significant if  $qvalue < 0.005$  and  $|\log_2\text{Fold}$   
62  $\text{change}| > 1$ . Blue in bar represent low gene expression, and genes marked in red means  
63 the common down-DEGs in 7-5 and T45 background. Gene details are given in File S2.



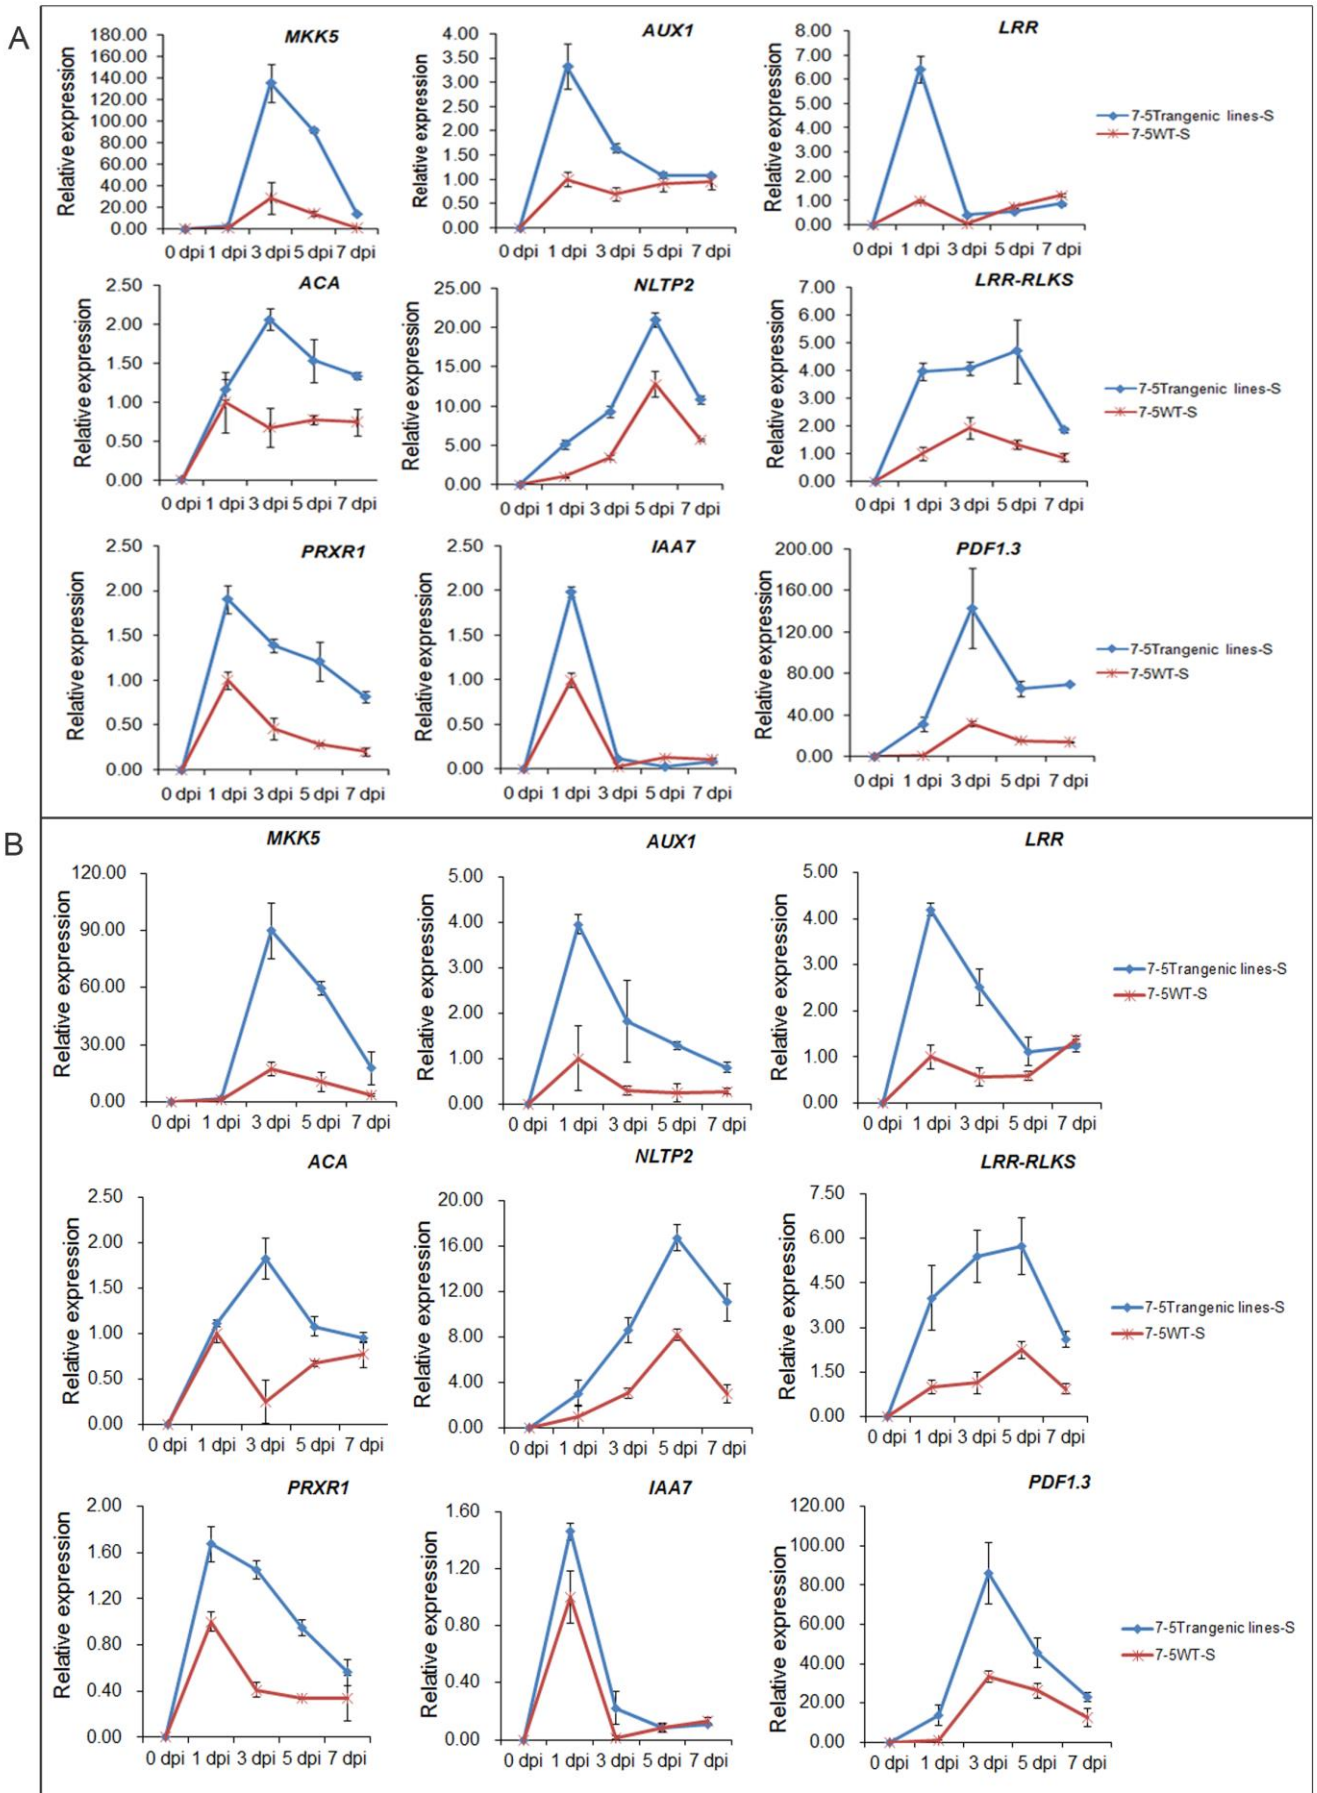

64 **Fig. S6. qPCR confirmation of the differentially expressed genes (DEGs) between**

65 **7-5 transgenic lines and wild type lines after inoculation.**

66 Total RNA was extracted from stem inoculated with *S. sclerotiorum* over time. The  
67 expression levels of these genes in transgenic and WT lines inoculated with *S.*  
68 *sclerotiorum* were determined by qPCR and normalized to *BnACTIN7* (A) and  
69 ubiquitin-conjugating enzyme 21 (B). Values are means  $\pm$  SD (n = 3). Error bars  
70 represent standard deviation from three biological replicates. The gene details are  
71 shown in the File S2 and the primers are listed in the table S4.

72

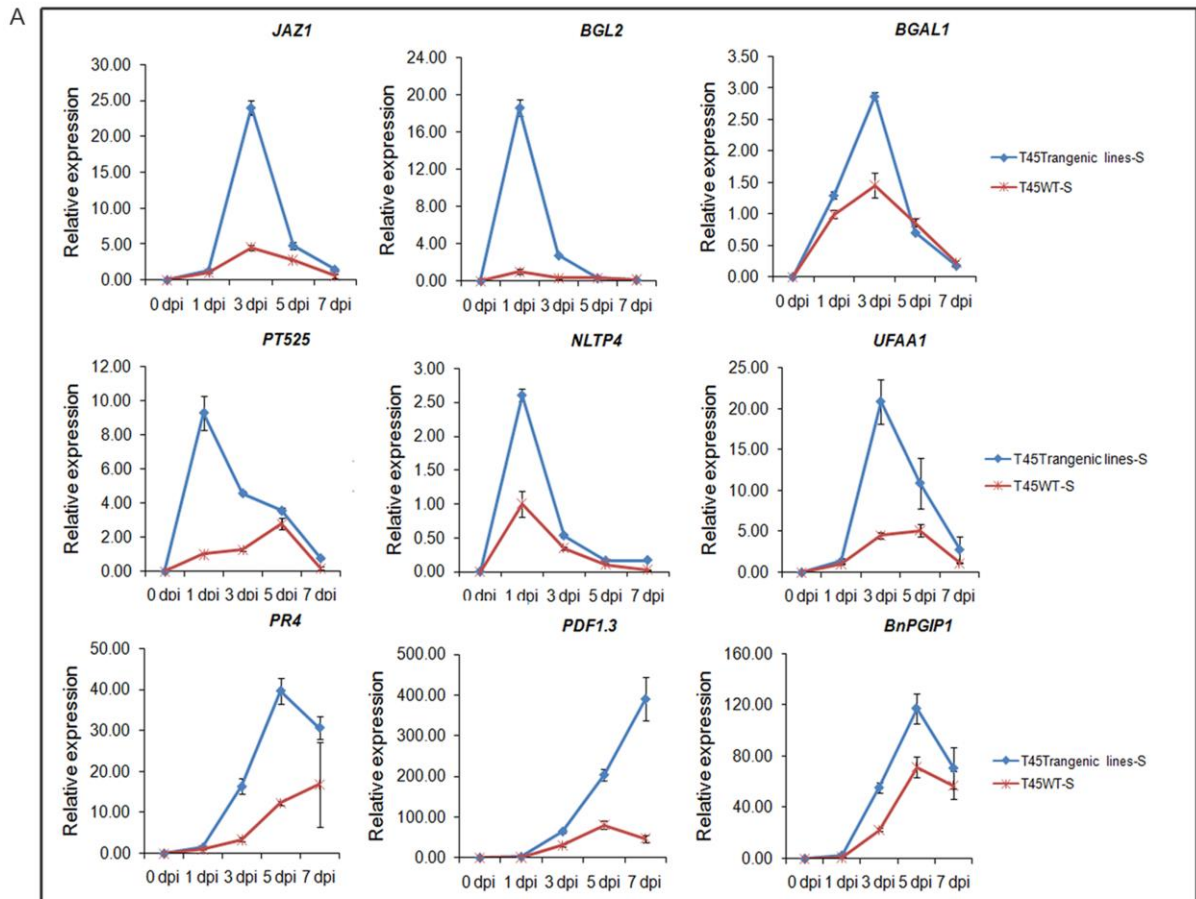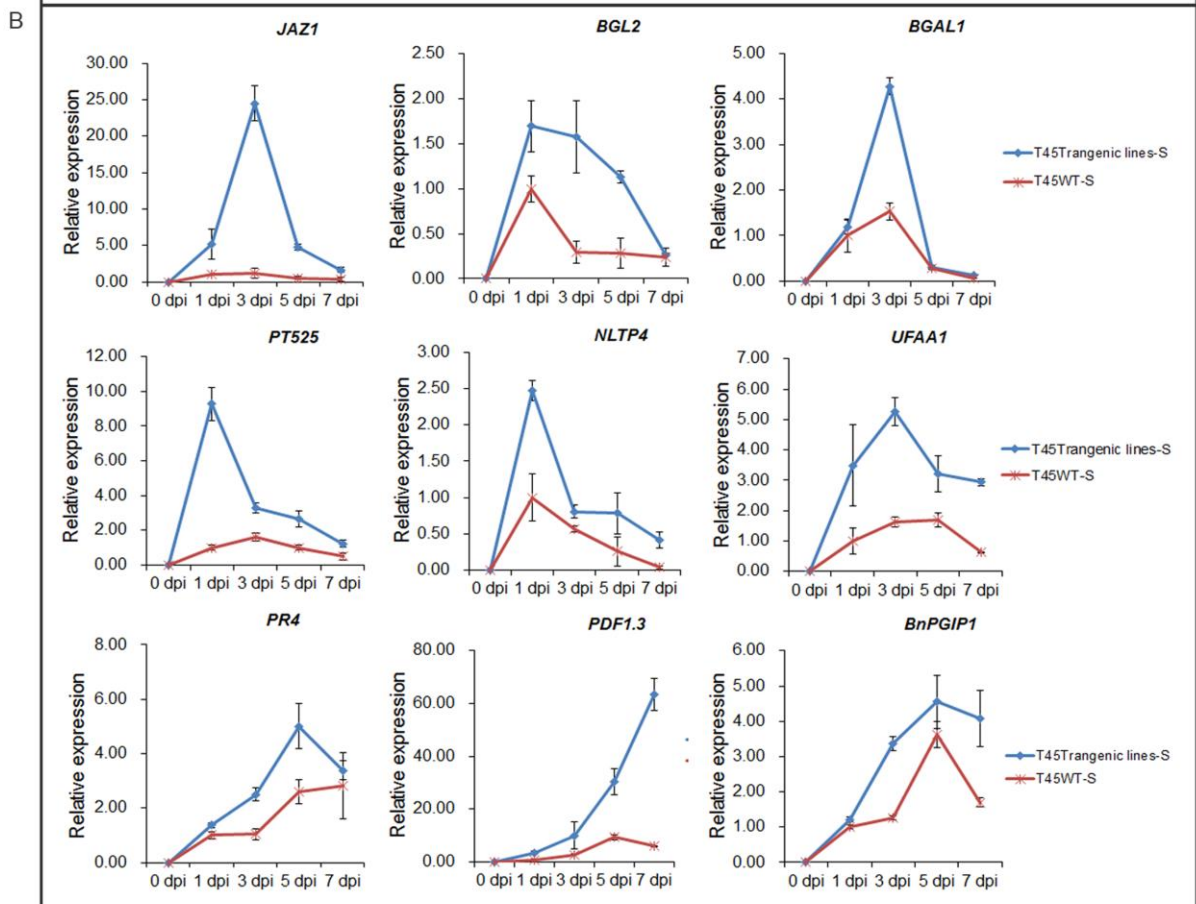

74 **Fig. S7. qPCR confirmation of the differentially expressed genes (DEGs) between**  
75 **T45 transgenic lines and non-transgenic lines after inoculation.**

76 Total RNA was extracted from stem inoculated with *S. sclerotiorum* over time. The  
77 expression levels of these genes in transgenic and WT lines inoculated with *S.*  
78 *sclerotiorum* were determined by qPCR and normalized to *BnACTIN7* (A) and  
79 ubiquitin-conjugating enzyme 21 (B). Values are means  $\pm$  SD (n = 3). Error bars  
80 represent standard deviation from three biological replicates. The gene details are  
81 shown in the File S2 and the primers are listed in the table S4.

82

83

A.  
mV

7-5WT in the flowering period

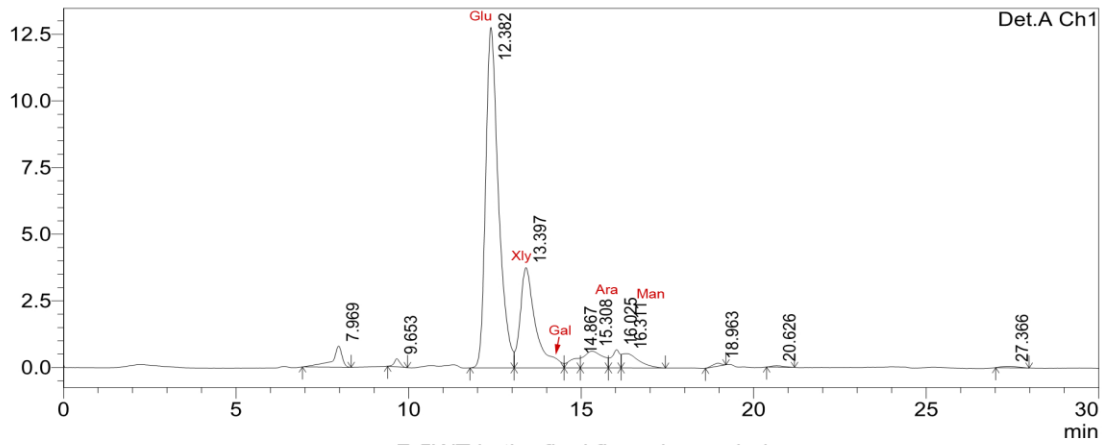B  
mV

7-5WT in the final flowering period

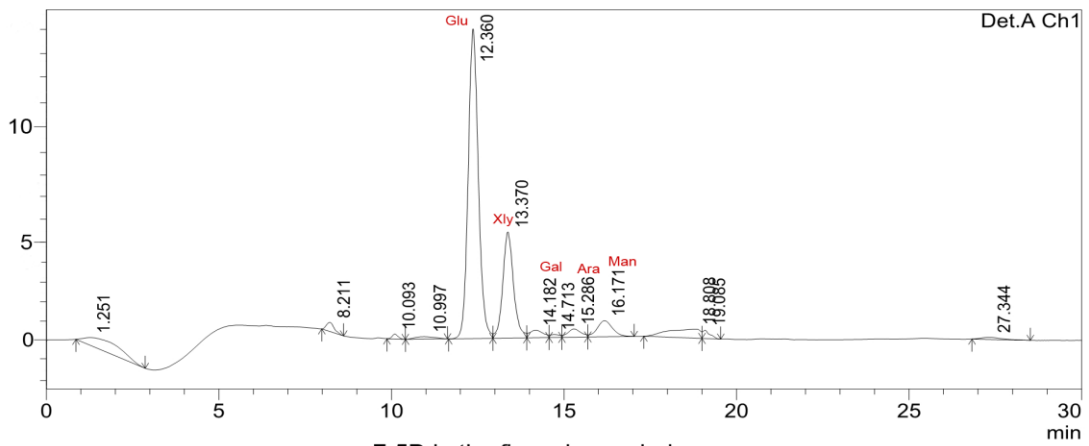C  
mV

7-5D in the flowering period

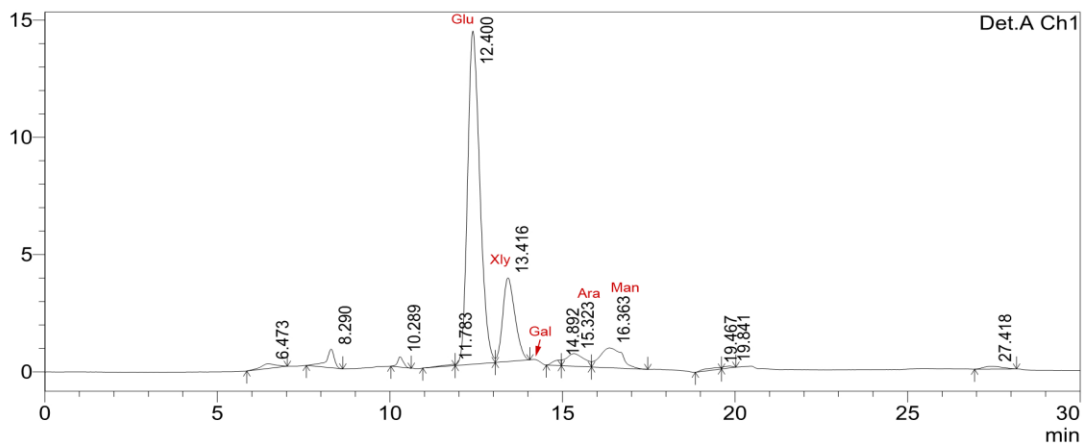D  
mV

7-5D in the final flowering period

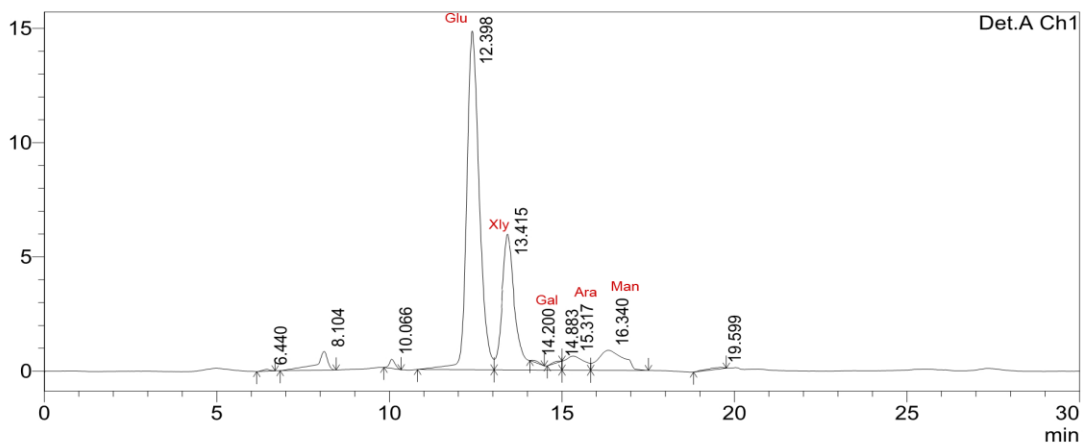

84 **Fig. S8. Determination of cell wall monosaccharide in the transgenic lines at**  
85 **different stages by high performance liquid chromatography.**

86

87

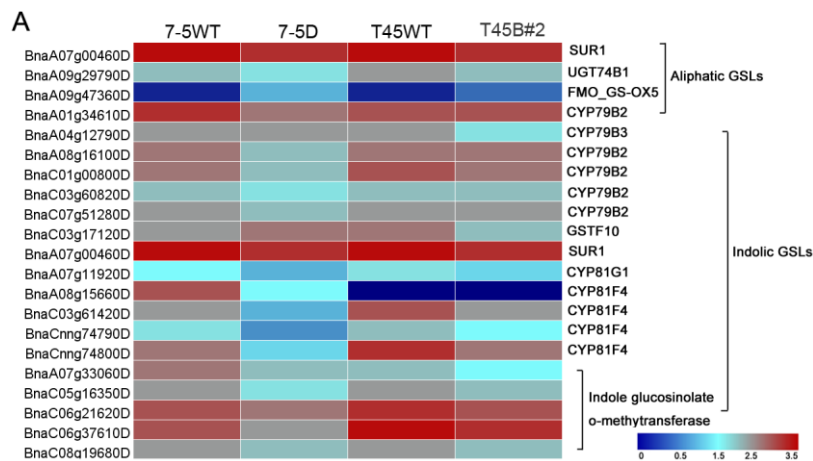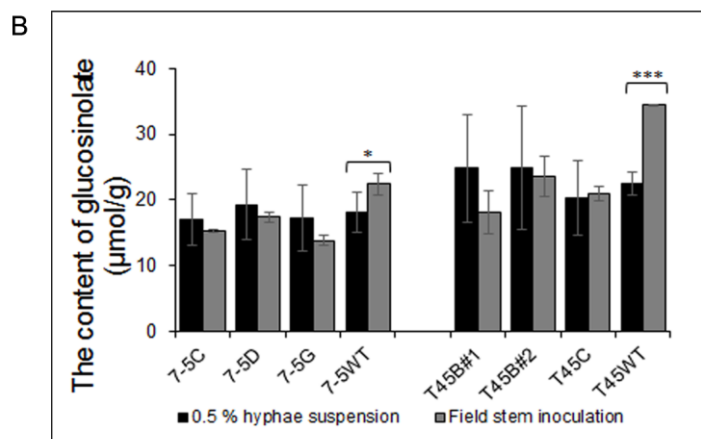

88

89 **Fig. S9. The expression of GSLs biosynthesis genes and the content of seed GSLs.**

90 (A) Heatmap of the differentially expressed genes in GSLs biosynthesis. The details of  
 91 the differentially expressed genes in GSLs biosynthesis pathway in T45WT, T45B#2,  
 92 7-5WT and 7-5D lines response to *S. sclerotiorum* were show in the File S3. (B) The  
 93 seed GSLs content of transgenic *OsPGIP2* rapeseed evaluated after inoculation with *S.*  
 94 *sclerotiorum*. The black columns represented the seed GSLs content of T<sub>3</sub> generations  
 95 after infection with 0.5 % *S. sclerotiorum* hyphae suspension in the field. The grey  
 96 columns showed the seed GSLs content of T<sub>4</sub> generations for field stem inoculation of  
 97 *S. sclerotiorum*. The field assays in T<sub>3</sub> and T<sub>4</sub> generations were respectively designed  
 98 in two completely randomized blocks and each replicate contained about 20 plants. WT  
 99 indicates non-transformed rapeseed plants. Values are the means over nine replicates ±  
 100 standard deviation. Seed GSLs content were measured based on dry matter weight.  
 101 \*\*\*P < 0.001 and \*P < 0.05 were tested by one-way ANOVA.

102

103 **Table S1. Field testing data of individual rapeseed lines in three consecutive years.**

| Variety | The length of the lesions on the stem(cm) |                |                |
|---------|-------------------------------------------|----------------|----------------|
|         | T <sub>2</sub>                            | T <sub>3</sub> | T <sub>4</sub> |
| 7-5C    | 3.12±0.24***                              | 4.81±0.23*     | 3.98±0.21**    |
| 7-5D    | 3.89±0.24***                              | 4.40±0.35*     | 4.15±0.20*     |
| 7-5G    | 4.43±0.27***                              | 3.90±0.22***   | 4.34±0.28*     |
| 7-5WT   | 6.65±0.24                                 | 5.57±0.32      | 5.44±0.21      |
| T45B#1  | 4.42±0.28***                              | 4.40±0.29***   | 3.64±0.04***   |
| T45B#2  | 6.43±0.21***                              | 3.59±0.25***   | 4.90±0.05**    |
| T45C    | 6.49±0.27***                              | 4.70±0.33**    | 4.68±0.05**    |
| T45WT   | 8.27±0.23                                 | 5.93±0.30      | 6.68±0.07      |

104 All plants were investigated the lesions length with stem inoculation at 7dpi. The length  
 105 of the lesions on the stem was showed with mean values (n>30) ± standard error. The  
 106 transgenic *OsPGIP2* lines were compared with their non-transformed lines, and  
 107 differences within each line were tested for significance by one-way ANOVA. (\*P <  
 108 0.05; \*\*P < 0.01; \*\*\*P < 0.001). 7-5WT and T45WT are the non-transgenic controls.  
 109



110 **Table S2. Number of clean sequence reads that map to the *Sclerotinia sclerotiorum***  
111 **1980 genome.**

|        | Clean reads | Total mapped | Mapped rate |
|--------|-------------|--------------|-------------|
| 7-5D   | 47130844    | 4633307      | 9.83%       |
| 7-5WT  | 54035950    | 6965718      | 12.89%      |
| T45B#2 | 43614190    | 8707432      | 19.96%      |
| T45WT  | 39654044    | 10768317     | 27.16%      |

112

113

**Table S3. The affinity between OsPGIP2 and *S. sclerotiorum* PGs.**

|               | Delt G <sup>a</sup> (kcal/mol) | Kd <sup>b</sup> (mol/L) |
|---------------|--------------------------------|-------------------------|
| OsPGIP2-SsPG1 | -16.09                         | 15.90e-13               |
| OsPGIP2-SsPG3 | -17.04                         | 3.20e-13                |
| OsPGIP2-SsPG5 | -17.02                         | 3.31e-13                |
| OsPGIP2-SsPG6 | -17.84                         | 0.82e-13                |

114 <sup>a</sup> Delt G is binding free energy.

115 <sup>b</sup> Kd is dissociation constant.

116 The affinities about OsPGIP2 and SsPGs were predicated in PPA-Pred2 (Protein-  
117 Protein Affinity Predictor) ([https://www.iitm.ac.in/bioinfo/PPA\\_Pred/prediction.html](https://www.iitm.ac.in/bioinfo/PPA_Pred/prediction.html)).

118 The class of the protein-protein complex is set as “Enzyme-Inhibitor”. The smaller the  
119 dissociation constant, the more tightly bound the ligand is, or the higher the affinity  
120 between ligand and protein.

121

122 **Table S4. Summary of primers used in this study.**

| Primer name   | Sequence (5'-3')           | Purpose                                                            |
|---------------|----------------------------|--------------------------------------------------------------------|
| 333-OsPGIP2-L | CACAACAACCTGTCCGGGAG       | Detection of <i>OsPGIP2</i> in transgenic families                 |
| 333-OsPGIP2-R | GTAGCAGTAGGCGTCGAACC       |                                                                    |
| 309-HYG       | GGCGACCTCGTATTGGGAAT       | Detection of <i>HYG</i> in transgenic families                     |
| 309-HYG       | ACCGCAAGGAATCGGTCAAT       |                                                                    |
| BnActin7-L    | GGAAGCTCCTGGAATCCATGAGA    | qPCR control for <i>B. napus</i>                                   |
| BnActin7-R    | TCTTTGCTCATACGGTCAGCAATTCC |                                                                    |
| UBC21-L       | CCTCTGCAGCCTCCTCAAGT       | qPCR control for <i>B. napus</i>                                   |
| UBC21-R       | CATATCTCCCCTGTCTTGAAATGC   |                                                                    |
| 169-OsPGIP2   | TTCGCGGAGGAGACGTA          | qPCR analysis of <i>OsPGIP2</i> expression                         |
| 169-OsPGIP2   | TGTGTTGGTAGCAGTAGGCG       |                                                                    |
| 321-OsPGIP2-L | CAATCTCTCCGCCATCAACCT      | Probe primers for southern blot                                    |
| 321-OsPGIP2-R | TGGCTCACGTCCACGTAGTA       |                                                                    |
| PDF1.3-L      | TCATGGCTAAGGCTGCTACC       | qPCR analysis of <i>BnaC06g22120D</i> expression in 7-5WT and 7-5D |
| PDF1.3-R      | ACTCCTGACCATGTCCCACT       |                                                                    |
| CAT1-L        | TACAGACACGAAACAGCA         | qPCR analysis of <i>BnaA07g11370D</i> expression in 7-5WT and 7-5D |
| CAT1-R        | GACAGAACTAGCAAGCC          |                                                                    |
| LRR-RLKs-7L   | GATTGAGGCGGAGTTTGG         | qPCR analysis of <i>BnaA09g57210D</i> expression in 7-5WT and 7-5D |
| LRR-RLKs-7R   | CTCGCAGTGCATAGGATA         |                                                                    |
| BAM1-7L       | AAAACAGCGACAGAGGGT         | qPCR analysis of <i>BnaA06g24650D</i> expression in 7-5WT and 7-5D |
| BAM1-7R       | CGTGAAAGCCGAGTAAAA         |                                                                    |
| ACA4-7L       | TAGTGAAAGTGGCTAGATGG       | qPCR analysis of <i>BnaC04g47760D</i> expression in 7-5WT and 7-5D |
| ACA4-7R       | CAGTGAGTGGAGCAGACC         |                                                                    |
| PRXR1-7L      | GCAGTCCAGTATGTGCGTAA       | qPCR analysis of <i>BnaA01g11800D</i> expression in 7-5WT and 7-5D |
| PRXR1-7R      | CACCCTTGAACCAAGTCA         |                                                                    |
| PER21-7L      | TTGCCCAAGTCCAAACCC         |                                                                    |

|          |                      |                                                                    |
|----------|----------------------|--------------------------------------------------------------------|
| PER21-7R | GACCAGGAGCCCTCTATG   | qPCR analysis of <i>BnaC03g20530D</i> expression in 7-5WT and 7-5D |
| PER45-7L | GTGATGGCTGAGACAAAA   | qPCR analysis of <i>BnaAnng10890D</i> expression in 7-5WT and 7-5D |
| PER45-7R | TTCAACAAGGAAAGGGTC   |                                                                    |
| EBP-7L   | AGCCAAACTCAACTTCCC   | qPCR analysis of <i>BnaC01g35070D</i> expression in 7-5WT and 7-5D |
| EBP-7R   | CTCCCCACTCCACTGTAC   |                                                                    |
| EBP-7L   | AGCCAAACTCAACTTCCC   | qPCR analysis of <i>BnaA03g34290D</i> expression in 7-5WT and 7-5D |
| EBP-7R   | TCCAAAACCGCAACTCAT   |                                                                    |
| AUX1-7L  | TCGGTGGATGGGCTAGTGTA | qPCR analysis of <i>BnaC04g07210D</i> expression in 7-5WT and 7-5D |
| AUX1-7R  | CAAAGGCGGTGGTGTAAGC  |                                                                    |
| IAA7-7L  | GAATCTGGCAAATCGGCGG  | qPCR analysis of <i>BnaC05g29300D</i> expression in 7-5WT and 7-5D |
| IAA7-7R  | GCTGAGGCGACGTTGTTAAG |                                                                    |
| LRR-7L   | AGGGACCAATCCCGAGATCA | qPCR analysis of <i>BnaA05g20090D</i> expression in 7-5WT and 7-5D |
| LRR-7R   | CAAGCCCTCAAAGGTTTGCC |                                                                    |
| BGL2-7L  | TGTTCAAACCGACCCCTGTA | qPCR analysis of <i>BnaC08g28170D</i> expression in 7-5WT and 7-5D |
| BGL2-7R  | CCACGATTTCCAACGACC   |                                                                    |
| TUB6-7L  | AATGGATACCGAACAACG   | qPCR analysis of <i>BnaC09g44450D</i> expression in 7-5WT and 7-5D |
| TUB6-7R  | TGAACTGCTCACTCACCC   |                                                                    |
| TUB1-7L  | GAGAACGCTGATGAATGC   | qPCR analysis of <i>BnaC06g36460D</i> expression in 7-5WT and 7-5D |
| TUB1-7R  | ATGGGATAAGGTTGACTGC  |                                                                    |
| BGAL1-7L | AGATGACCACGGTGAAGT   | qPCR analysis of <i>BnaA05g25660D</i> expression in 7-5WT and 7-5D |
| BGAL1-7R | AGGTGCTACGGTTACAGA   |                                                                    |
| WAT1-7L  | CCGTCAAGTCGTCCATCACA | qPCR analysis of <i>BnaC06g22370D</i> expression in 7-5WT and 7-5D |
| WAT1-7R  | AACGGCACACCATTGGGTAA |                                                                    |
| PT525-7L | CTATGAATGTTGCTGGTG   | qPCR analysis of <i>BnaA03g03250D</i> expression in 7-5WT and 7-5D |
| PT525-7R | CTTCTTCTGAGCCTCTTT   |                                                                    |
| NLTP2-7L | TGTCACTGGAAACTACCC   |                                                                    |

|             |                      |                                                                      |
|-------------|----------------------|----------------------------------------------------------------------|
| NLTP2-7R    | GAGCCTTGAGTTTTGATG   | qPCR analysis of <i>BnaA02g09030D</i> expression in 7-5WT and 7-5D   |
| MKK5-7L     | CGGTTACGCTGGAGATGTGT | qPCR analysis of <i>BnaA01g25260D</i> expression in 7-5WT and 7-5D   |
| MKK5-7R     | TTCAGGCGGCTGAGACATAC |                                                                      |
| PER54-T45-L | TTCTCCCACCATCCCTAT   | qPCR analysis of <i>BnaA10g24230D</i> expression in T45WT and T45B#2 |
| PER54-T45-R | TCAGCAGAGCCAGACCTT   |                                                                      |
| JAZ1-T45-L  | TACGGCGGGCAAGTGATT   | qPCR analysis of <i>BnaA06g13250D</i> expression in T45WT and T45B#2 |
| JAZ1-T45-R  | TTGGTTCGGGGTAGGAGC   |                                                                      |
| PGIP1-T45-L | GTCATTTGGGTCGTTTCC   | qPCR analysis of <i>BnaA10g24090D</i> expression in T45WT and T45B#2 |
| PGIP1-T45-R | ACGTCGTTTTGTTGGCTC   |                                                                      |
| PR4-T45-L   | ACCACGGCTGACTACTGT   | qPCR analysis of <i>BnaC03g33900D</i> expression in T45WT and T45B#2 |
| PR4-T45-R   | ATAGGCACTCACGGCTCT   |                                                                      |
| BGL2-T45-L  | TCTCCTCTGCTCGTGAAT   | qPCR analysis of <i>BnaC04g24490D</i> expression in T45WT and T45B#2 |
| BGL2-T45-R  | AGGTTTTGTAATGGTGC    |                                                                      |
| BGAL1-T45-L | GCTGTCACGCTCATCACT   | qPCR analysis of <i>BnaC05g39570D</i> expression in T45WT and T45B#2 |
| BGAL1-T45-R | CCACGGCTAGTTTCTTCA   |                                                                      |
| BGAL4-T45-L | GTCACGCTGAAGGGAGTA   | qPCR analysis of <i>BnaAnng30540D</i> expression in T45WT and T45B#2 |
| BGAL4-T45-R | CTGGTGCGGCAAAAAGTAG  |                                                                      |
| PT525-T45-L | CGGGAAGTGACGCTATGC   | qPCR analysis of <i>BnaC09g10200D</i> expression in T45WT and T45B#2 |
| PT525-T45-R | TGTGAACGGAAGGCTGAG   |                                                                      |
| NLTP4-T45-L | ACACCGTCAAGTGAAATG   | qPCR analysis of <i>BnaCnng42990D</i> expression in T45WT and T45B#2 |
| NLTP4-T45-R | CAAAC TAGGACATGCTGA  |                                                                      |
| NLTP2-T45-L | CCCAACGCTCGTAAAGTC   | qPCR analysis of <i>BnaC03g40460D</i> expression in T45WT and T45B#2 |
| NLTP2-T45-R | CGCATACCAAAGCAGGA    |                                                                      |
| UFAA1-T45-L | GACAGACAAAAGCCAATC   | qPCR analysis of <i>BnaC07g07970D</i> expression in T45WT and T45B#2 |
| UFAA1-T45-R | AGTTTCCAAGGGTAAGAG   |                                                                      |

|                  |                                                         |                                                              |
|------------------|---------------------------------------------------------|--------------------------------------------------------------|
| C-kpnI-OsPGIP2-L | TACGCGTCCCCGGGGC<br><u>GGTACC</u> ATGGATGTGAAGCTCCTGC   | Subclone <i>OsPGIP2</i> into JW772-CLUC                      |
| C-Sall-OsPGIP2-R | ACGAAAGCTCTGCAG <u>GTCGAC</u><br>TTATCGACGACGGCAGGCGG   |                                                              |
| N-kpnI-SsPG1-L   | ACGGGGGACGAGCTC <u>GGTACC</u><br>ATGGTTGAGATTCTTTCCTCGG | Subclone <i>SsPG1</i> into JW772-NLUC                        |
| N-Sall-SsPG1-R   | CGCGTACGAGATCTG <u>GTCGAC</u><br>ACACTTGACACCAGATGGG    |                                                              |
| N-kpnI-SsPG3-L   | ACGGGGGACGAGCTC <u>GGTACC</u><br>ATGAAAATCAACAACCAACTC  | Subclone <i>SsPG3</i> into JW772-NLUC                        |
| N-Sall-SsPG3-R   | CGCGTACGAGATCTG <u>GTCGAC</u><br>TGCAGGGCATCCAGAAGATG   |                                                              |
| N-kpnI-SsPG5-L   | ACGGGGGACGAGCTC <u>GGTACC</u><br>ATGGTTAACCTTCTGCCCT    | Subclone <i>SsPG5</i> into JW772-NLUC                        |
| N-Sall-SsPG5-R   | CGCGTACGAGATCTG <u>GTCGAC</u><br>CAAGGAGCAAGAGACGCCA    |                                                              |
| N-kpnI-SsPG6-L   | ACGGGGGACGAGCTC <u>GGTACC</u><br>ATGCATAGAGACTTTTCCATC  | Subclone <i>SsPG6</i> into JW772-NLUC                        |
| N-Sall-SsPG6-R   | CGCGTACGAGATCTG <u>GTCGAC</u><br>CTTAGGACAGCCGGTTGA     |                                                              |
| SsPG1-L          | GTGGTCACGGTCTCTCCATC                                    | qPCR analysis of <i>SsPG1</i> expression in T45WT and T45B#2 |
| SsPG1-R          | TGTCCTTGTAGGTAACGCCG                                    |                                                              |
| SsPG3-L          | GGAGATGCCCTAACTCAGC                                     | qPCR analysis of <i>SsPG3</i> expression in T45WT and T45B#2 |
| SsPG3-R          | TAGAACCAGATGTGACGGCG                                    |                                                              |
| SsPG5-L          | GGTCTTTCGTTGGATCCGT                                     | qPCR analysis of <i>SsPG5</i> expression in T45WT and T45B#2 |
| SsPG5-R          | AGGGTGATGCCTGAGTAGGT                                    |                                                              |
| SsPG6-L          | TGTTACGAGCGGGAACAACA                                    | qPCR analysis of <i>SsPG6</i> expression in T45WT and T45B#2 |
| SsPG6-R          | GGTGGTTCCTTCGTTGACT                                     |                                                              |

|          |                      |                                         |
|----------|----------------------|-----------------------------------------|
| SsH3-L   | ATGGCTCGTACCAAGCAAAC | qPCR control for <i>S. sclerotiorum</i> |
| SsH3-R   | AGAGCACCAATAGCGGAAGA |                                         |
| 28rDNA-L | CTGAAAGGCCTGTGAGCACT | qPCR control for <i>S. sclerotiorum</i> |
| 28rDNA-R | CCCATTGCCGTCTAGTCTGT |                                         |

123 The underscore indicates the cleavage site.
